# Supplementary material
Source: PubMed Central journal article supplement (PMC2034261)

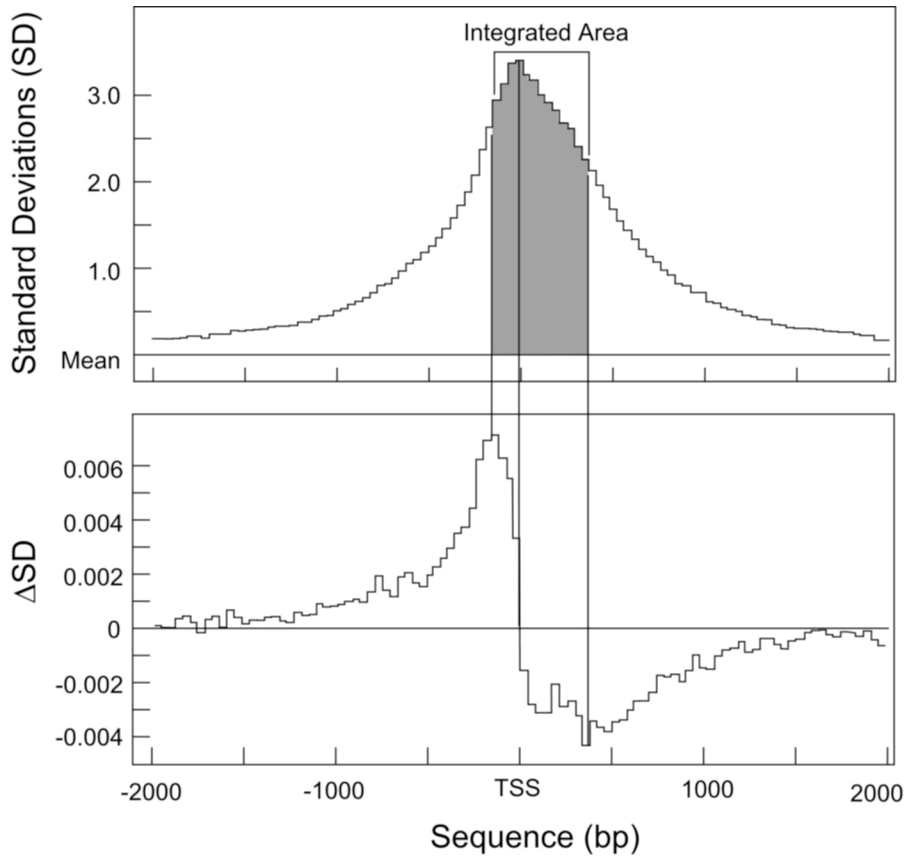

Supplement: pnas_0707203104_1.pdf [file pnas_0707203104_1.pdf]
